# Supplementary material
Source: MDPI journal article supplement (https://www.mdpi.com/2813-4168/2/1/3)
Supplement: s1 [file s1]

Table S1: For each reference site, the correlation matrix percentages between meteorological turbulence variables and ammonia concentrations, divided into quartiles.

| NH <sub>3</sub> |      | <Q1  | Q1-Q2 | Q2-Q3 | Q3-Q4 | NH <sub>3</sub> |      | <Q1  | Q1-Q2 | Q2-Q3 | Q3-Q4 |
|-----------------|------|------|-------|-------|-------|-----------------|------|------|-------|-------|-------|
| <b>1_RB</b>     | Dir  | 1%   | 1%    | 1%    | 6%    | <b>6_UB</b>     | Dir  | -3%  | 1%    | 0%    | 0%    |
|                 | Prec | -3%  | -3%   | -2%   | -2%   |                 | Prec | -2%  | -1%   | -2%   | -2%   |
|                 | Rad  | 3%   | 10%   | 5%    | -9%   |                 | Rad  | 9%   | 0%    | -4%   | -9%   |
|                 | Temp | 26%  | 8%    | -4%   | -5%   |                 | Temp | 19%  | 1%    | -5%   | -9%   |
|                 | RH   | -11% | -8%   | 2%    | 15%   |                 | RH   | 3%   | -1%   | 6%    | 7%    |
|                 | Vel  | -14% | -2%   | -2%   | -13%  |                 | Vel  | -10% | -2%   | -3%   | -9%   |
| <b>2_SU</b>     | Dir  | 8%   | 1%    | 1%    | 3%    | <b>7_RB</b>     | Dir  | 0%   | -1%   | 1%    | 6%    |
|                 | Prec | -1%  | 0%    | 1%    | -3%   |                 | Prec | 0%   | 4%    | -2%   | -3%   |
|                 | Rad  | 8%   | -4%   | -1%   | 1%    |                 | Rad  | 0%   | -2%   | 4%    | 6%    |
|                 | Temp | 0%   | -3%   | -4%   | -11%  |                 | Temp | 0%   | 3%    | 4%    | 10%   |
|                 | RH   | -15% | 3%    | -1%   | -6%   |                 | RH   | 0%   | 0%    | -4%   | -1%   |
|                 | Vel  | 18%  | -6%   | -2%   | -7%   |                 | Vel  | 0%   | 6%    | 2%    | 6%    |
| <b>3_RB</b>     | Dir  | -6%  | 0%    | 3%    | 3%    | <b>8_UB</b>     | Dir  | 2%   | -1%   | -3%   | -15%  |
|                 | Prec | -2%  | -1%   | -1%   | -3%   |                 | Prec | 0%   | -2%   | -4%   | -2%   |
|                 | Rad  | 7%   | 7%    | 4%    | -18%  |                 | Rad  | 1%   | 7%    | 12%   | 19%   |
|                 | Temp | 21%  | 9%    | 2%    | -7%   |                 | Temp | -9%  | 11%   | 12%   | 12%   |
|                 | RH   | -9%  | -6%   | 1%    | 19%   |                 | RH   | -6%  | -11%  | -9%   | -8%   |
|                 | Vel  | -5%  | -4%   | -7%   | -17%  |                 | Vel  | 5%   | 1%    | 2%    | 9%    |
| <b>4_UB</b>     | Dir  | -6%  | -3%   | 0%    | 7%    | <b>9_UI</b>     | Dir  | 4%   | -4%   | 0%    | 2%    |
|                 | Prec | 5%   | -1%   | -1%   | -3%   |                 | Prec | 5%   | -3%   | -1%   | 1%    |
|                 | Rad  | 12%  | 9%    | 3%    | -7%   |                 | Rad  | -8%  | -5%   | 1%    | 10%   |
|                 | Temp | 8%   | 12%   | 4%    | -13%  |                 | Temp | -29% | -2%   | 5%    | 13%   |
|                 | RH   | -10% | -7%   | -3%   | 13%   |                 | RH   | 16%  | 5%    | -2%   | -7%   |
|                 | Vel  | 12%  | 3%    | -3%   | -16%  |                 | Vel  | -14% | 4%    | 1%    | -4%   |
| <b>5_RB</b>     | Dir  | -3%  | -4%   | 2%    | 3%    | <b>10_RB</b>    | Dir  | 6%   | 3%    | 2%    | 13%   |
|                 | Prec | -3%  | -1%   | 0%    | -2%   |                 | Prec | 2%   | -1%   | -1%   | -1%   |
|                 | Rad  | 10%  | 6%    | 5%    | -4%   |                 | Rad  | -4%  | 1%    | 5%    | 19%   |
|                 | Temp | 13%  | 9%    | 3%    | -4%   |                 | Temp | -11% | 3%    | 3%    | 6%    |
|                 | RH   | -15% | -6%   | -2%   | 8%    |                 | RH   | 0%   | 0%    | 0%    | -6%   |
|                 | Vel  | -7%  | 0%    | 0%    | -8%   |                 | Vel  | -1%  | -2%   | -3%   | -5%   |

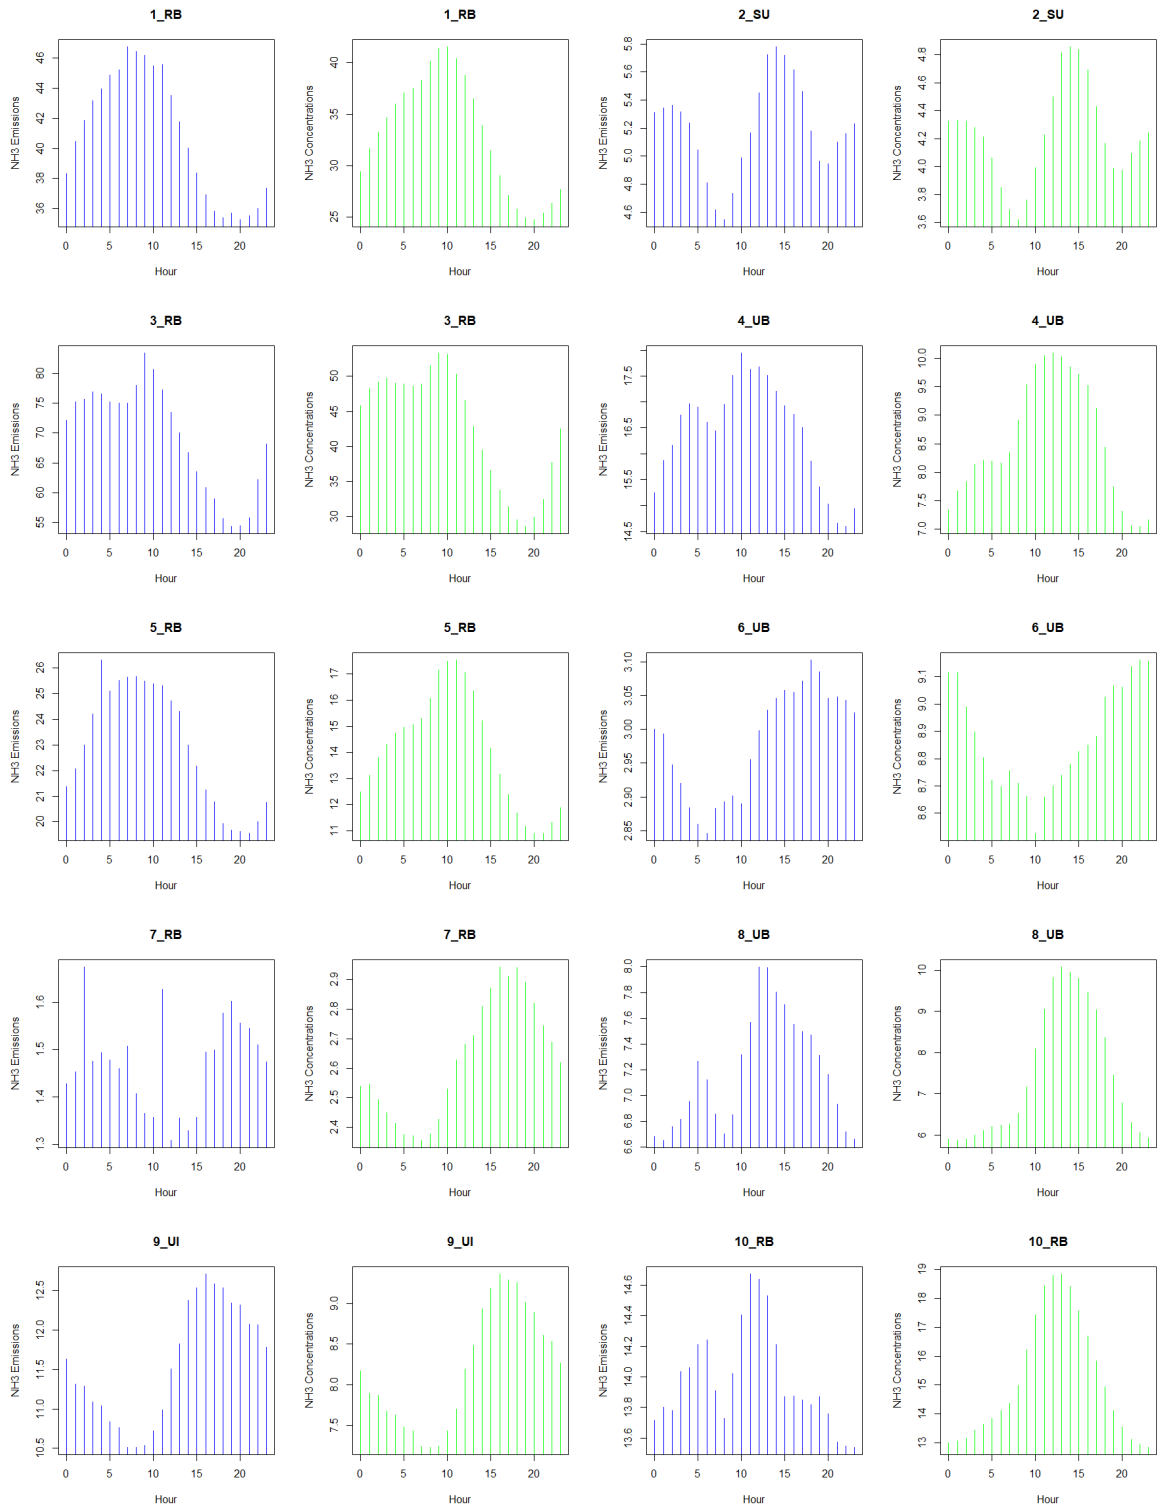

Figure S1: Average emission fluxes [kg/h] for each hour of the day compared to average measured ammonia concentrations [ $\mu\text{g}/\text{m}^3$ ].

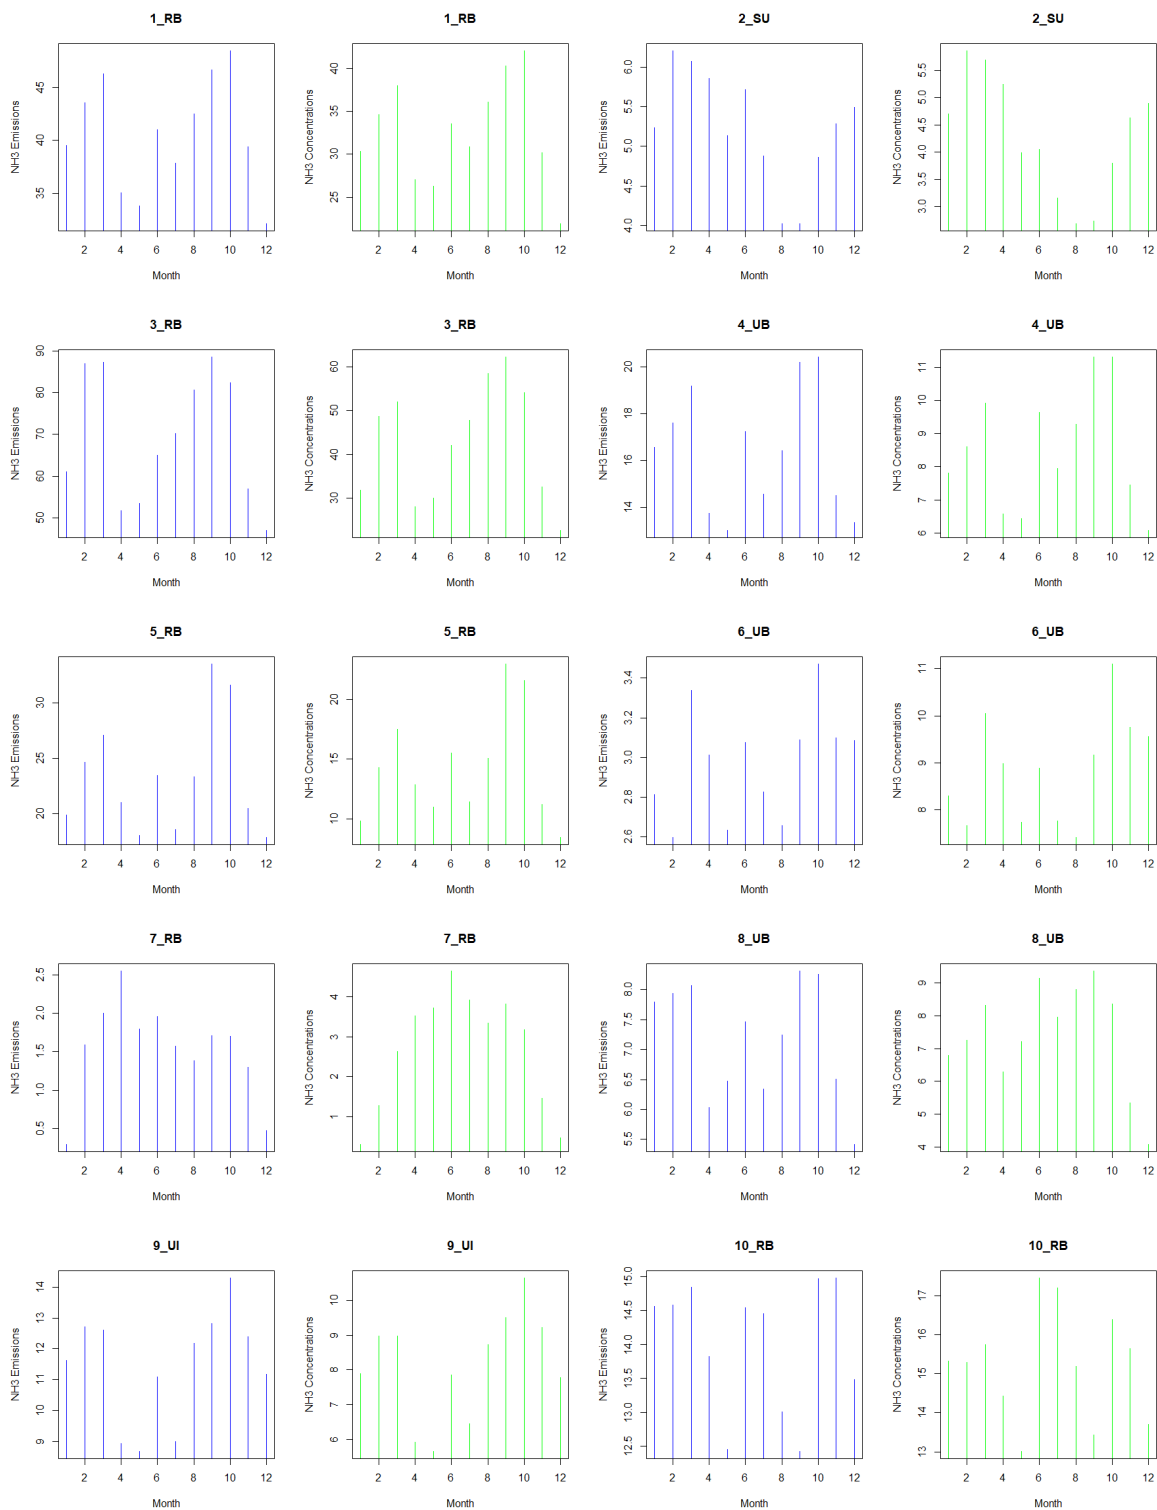

Figure S2: Average emission fluxes [kg/h] for each month of the year compared to average measured ammonia concentrations [ $\mu\text{g}/\text{m}^3$ ].

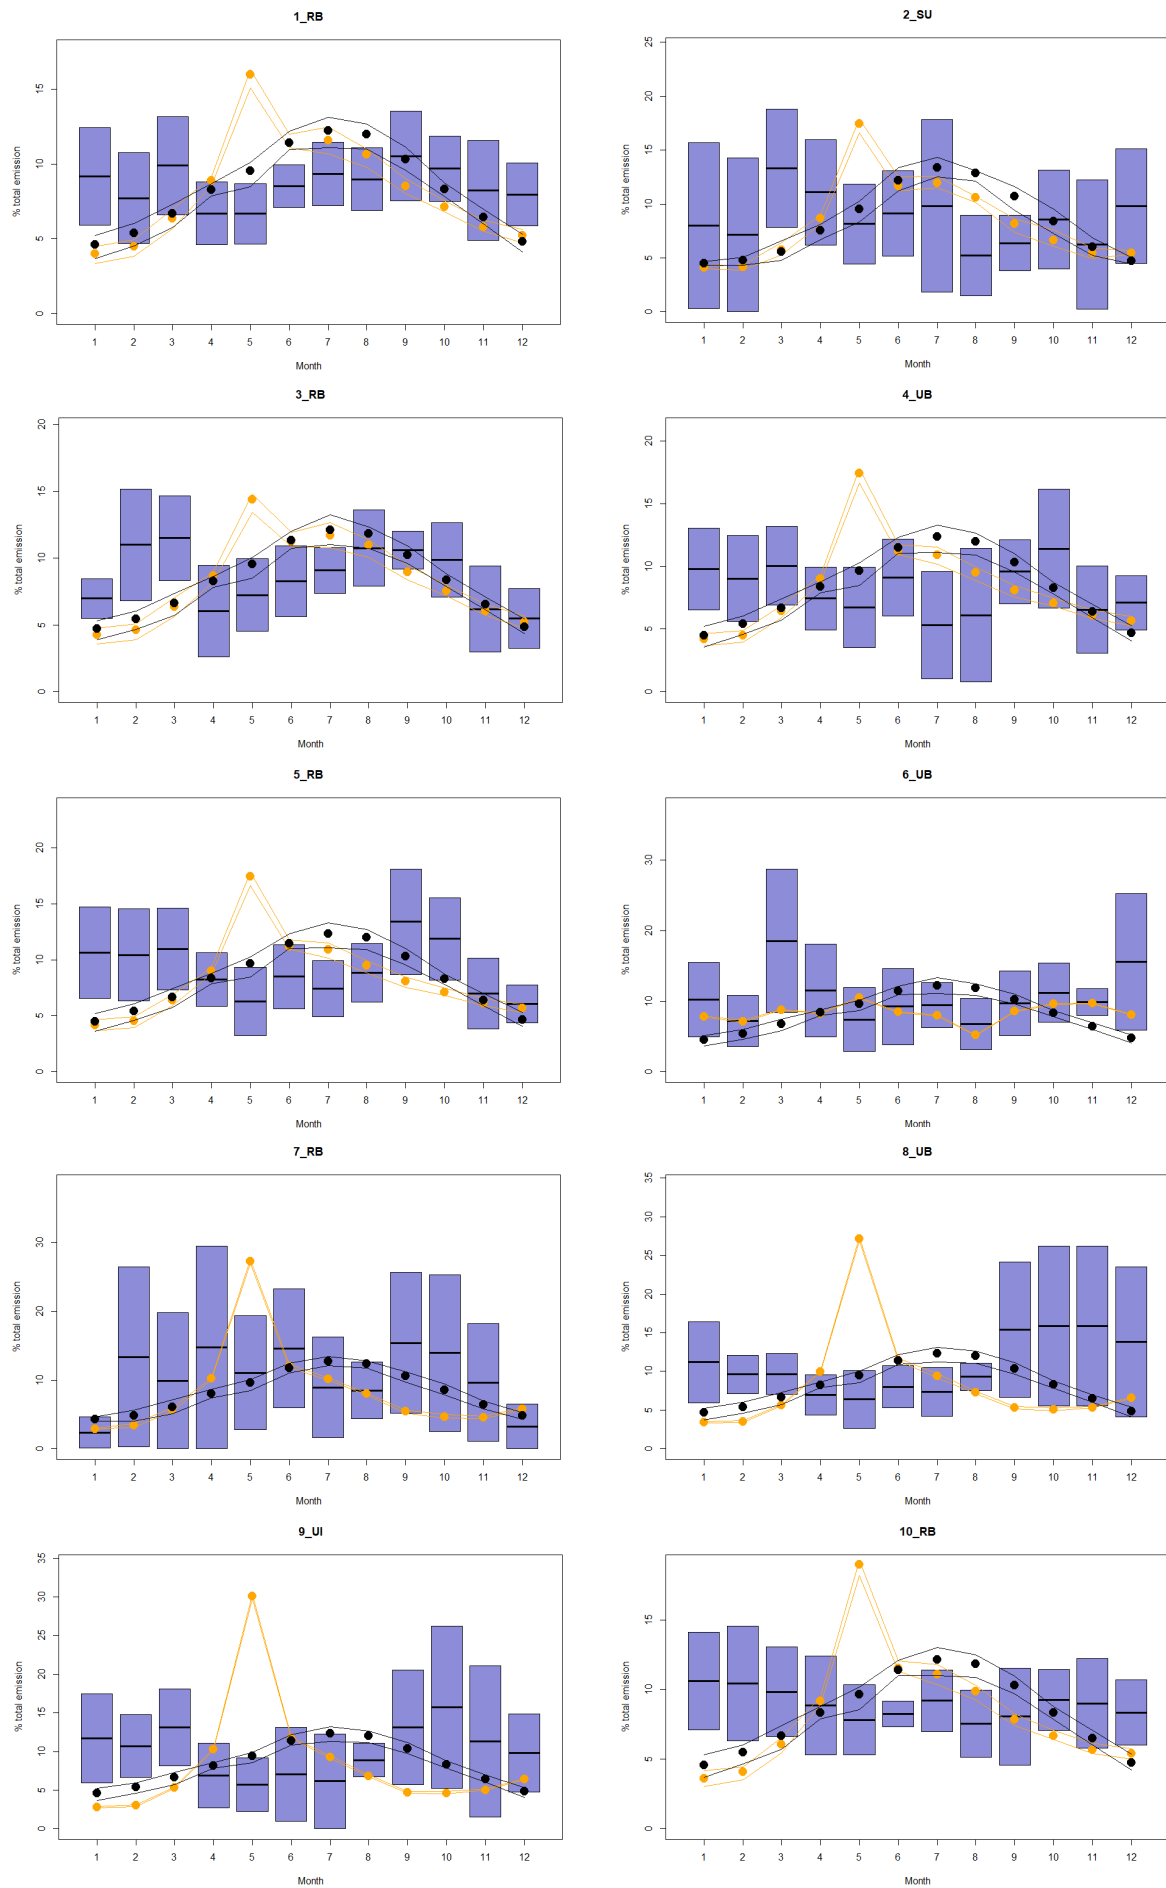

Figure S3: Comparison of  $\text{NH}_3$  monthly emissions variability between this study (2014–2022) (blue bars), CAMS-GLOB-ANT (2014–2022) (orange) [61,65,66], and Livestock CAMS-REG-TEMPO (2014–2020) (black) [64,65]. Values are expressed as ratios between monthly and annual totals for each year.

Table S2: Correlation test between ammonia flux estimates and measured ammonia concentrations.

| Id-Station | R squared |
|------------|-----------|
| 1_RB       | 0.68      |
| 2_SU       | 0.77      |
| 3_RB       | 0.61      |
| 4_UB       | 0.76      |
| 5_RB       | 0.54      |
| 6_UB       | 0.88      |
| 7_RB       | 0.20      |
| 8_UB       | 0.63      |
| 9_UI       | 0.90      |
| 10_RB      | 0.77      |

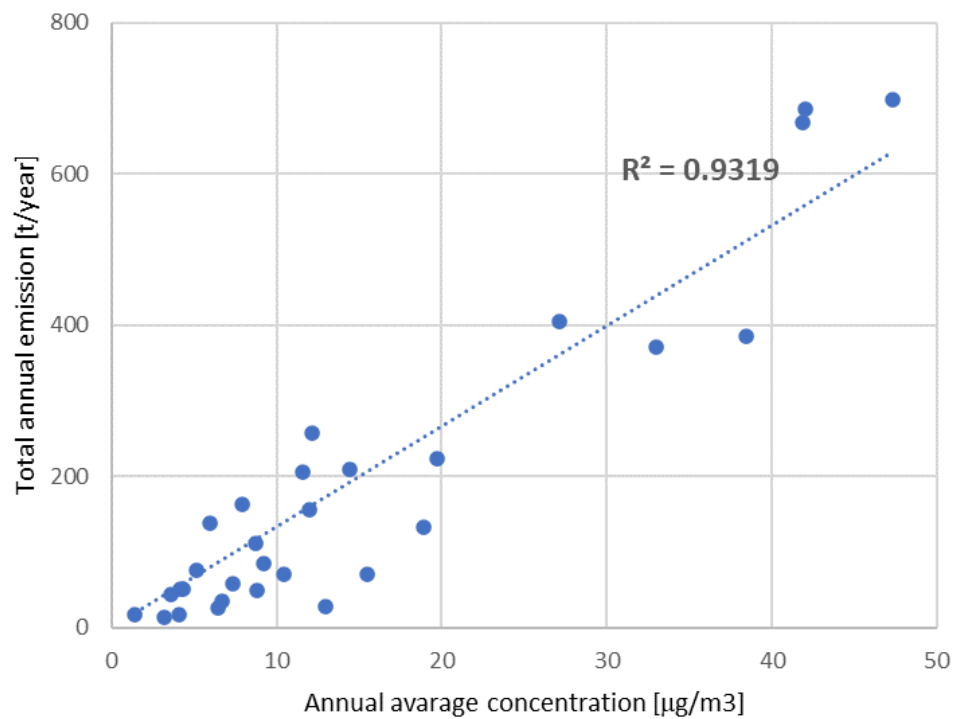

Figure S4: Calibration curve of the initial values of the emissions with the annual average concentrations of measured ammonia in different sites.
