# Supplementary material
Source: MDPI journal article supplement (https://www.mdpi.com/2813-4168/2/1/3)
Supplement: s1 [file s1]

Archive with 1 entries (1 files):
- air-2770828-supplementary.pdf
